# Supplementary material
Source: publisher figshare collection journal article supplement (https://karger.figshare.com/ndownloader/files/13563545)
Supplement: Supplementary file 1 [file 13563545]

**SUPPLEMENTARY MATERIAL**

**Supplementary Table 1.** List of allInternational Classification of Diseases, 9th revision, clinical modification codes (ICD-9-CM) used in the study

| **Condition** | **ICD-9-CM codes** |
| --- | --- |
| Kidney Transplantation Procedure | 55.6; 55.61, 55.69 |
| Liver transplantation Procedure | 50.5, 50.51, 50.59 |
| Pancreas Transplantation | 52.8, 52.80 to 52.86 |
| Heart Transplantation | 37.51 |
| Intestinal Transplantation | 46.97 |
| Cerebrovascular Accident (CVA) | 433.x1, 434.x1, 435.x, 436.x |
| Acute Myocardial Infarction (AMI) | 410.x, 410.x0, 410.x1, 410.x2 |
| HF | 402.01, 402.11, 402.91, 404.01, 404.03, 404.11, 404.13, 404.91, 404.93, 428.0, 428.x |

**Supplementary Figure 1.** Composition of “pulmonary circulation disorder” Elixhauser co-morbidity in all adults between 2004-2013 in United States

**Supplementary Figure 2.** Age-adjusted incidence of Major Adverse Cardiovascular Events (MACE) post kidney transplant in all adults in United States from 2004 through 2013.
